# Supplementary material for: Enhancer regulatory networks globally connect non-coding breast cancer loci to cancer genes
Source: PubMed Central journal article supplement — bioRxiv. 2023 Nov 20:2023.11.20.567880. Preprint. [Version 1] doi: 10.1101/2023.11.20.567880 (PMC10690208; doi:10.1101/2023.11.20.567880), 2023-11-20

**Supplementary Figure 1 - Select perturbation regions based on variants.**

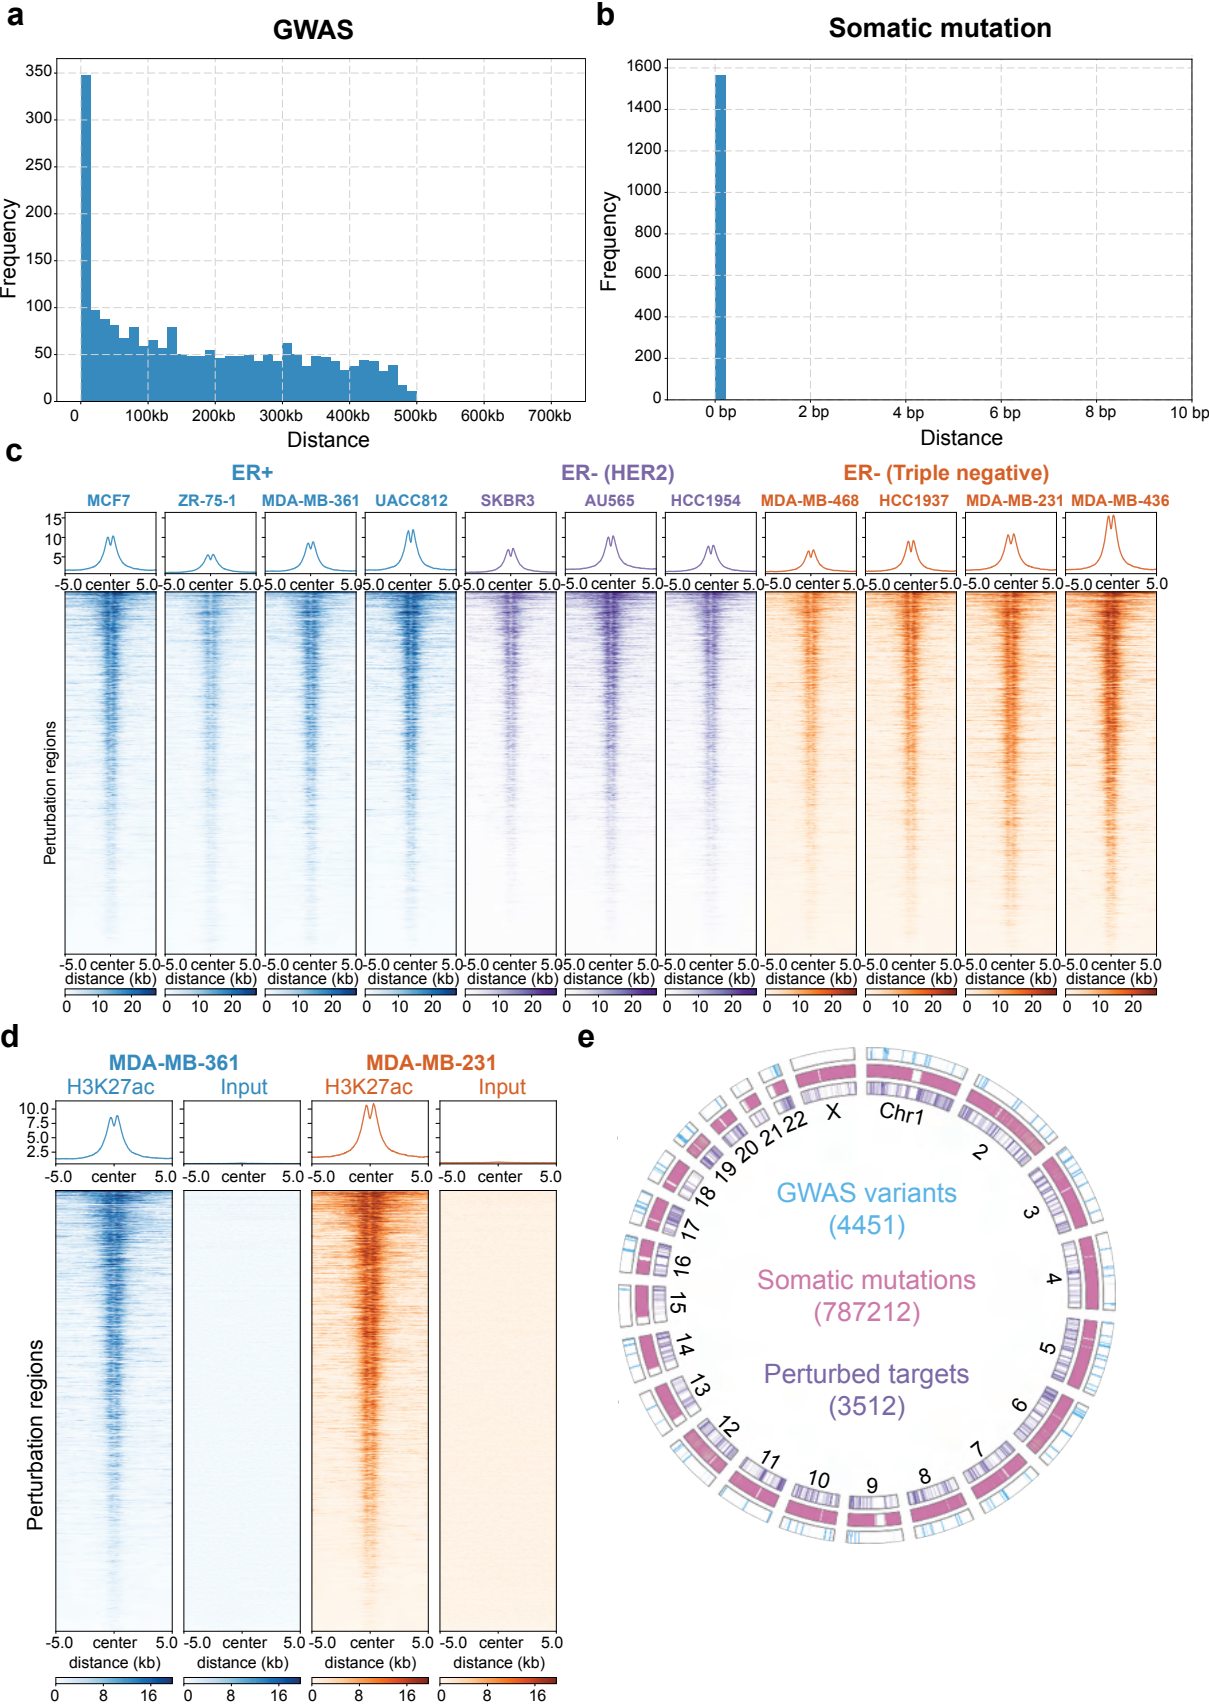

**Supplementary Figure 2 - (ER+) MDA-MB-361 and (ER-) MDA-MB-231 were selected by testing different subtypes of breast cancer cell lines.**

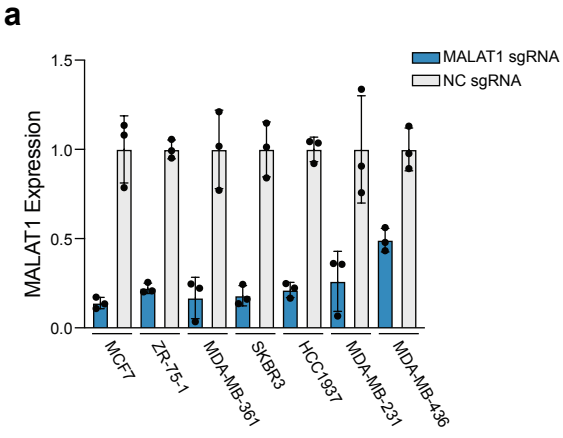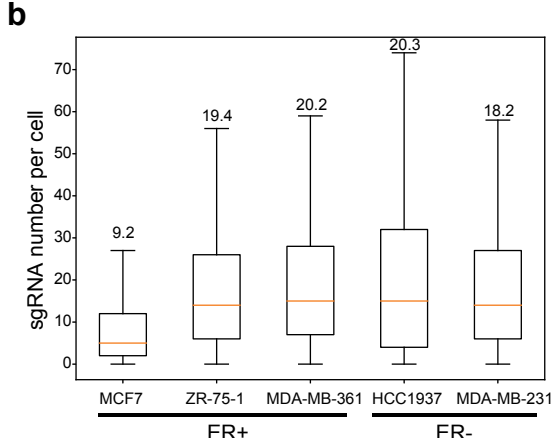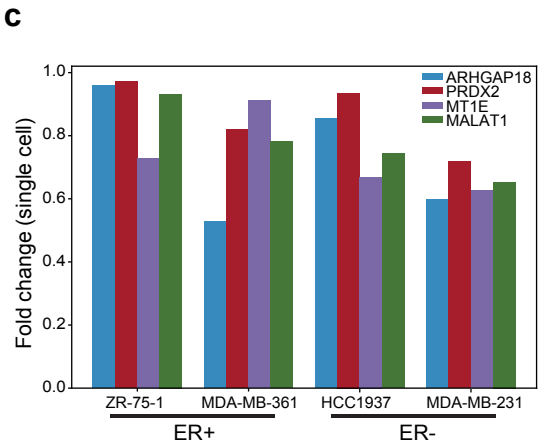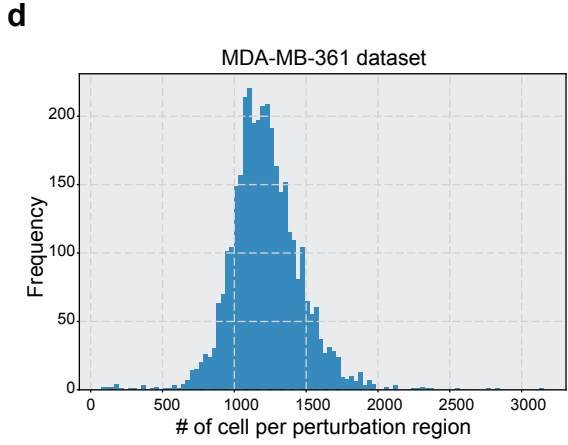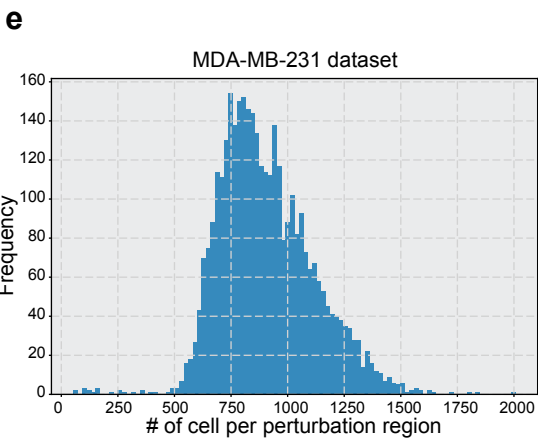

### Supplementary Figure 3 - Clonality does not affect the quality of this study.

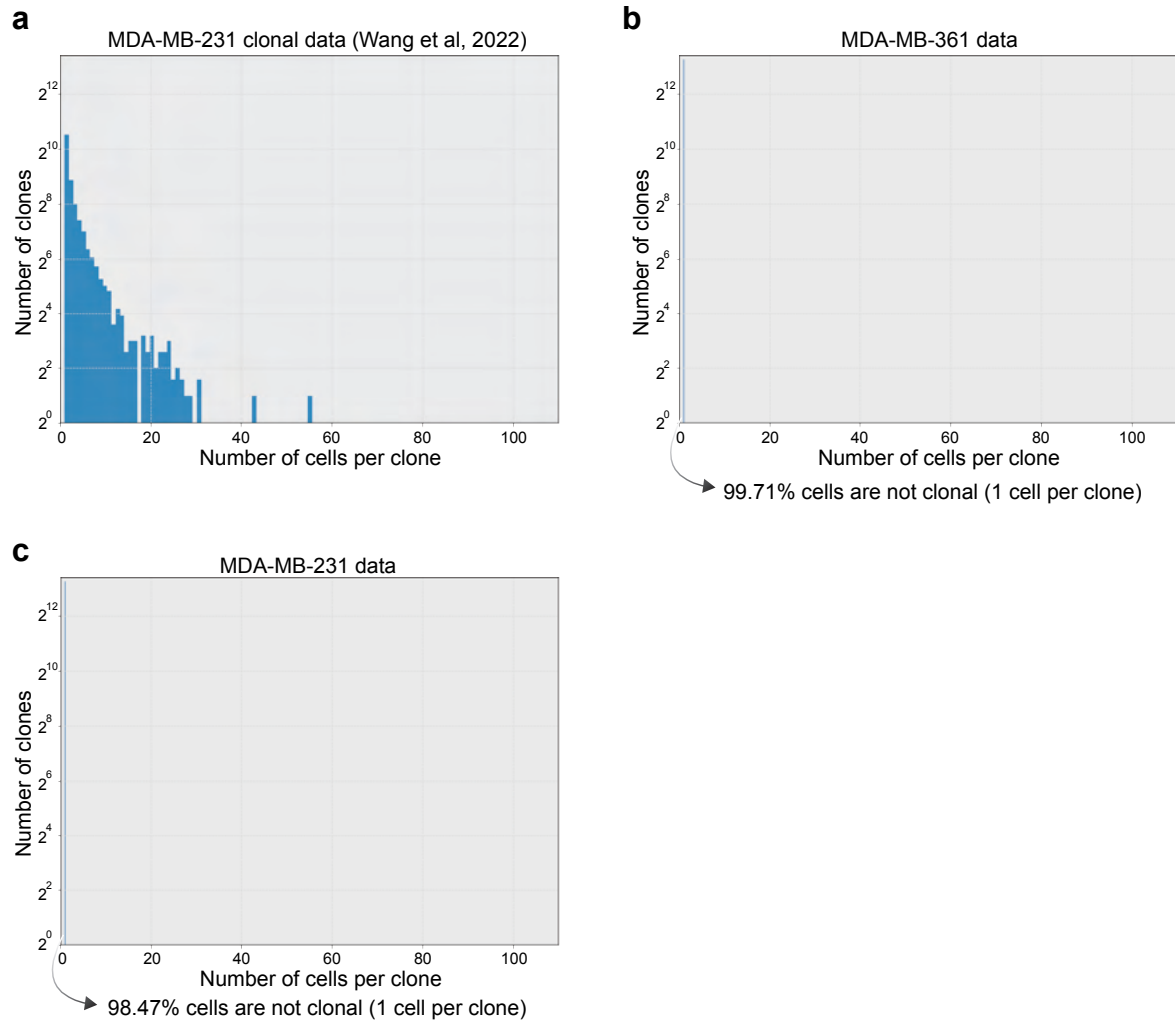

# Supplementary Figure 4 - Perturbation modules and gene programs of MDA-MB-361 GWAS dataset.

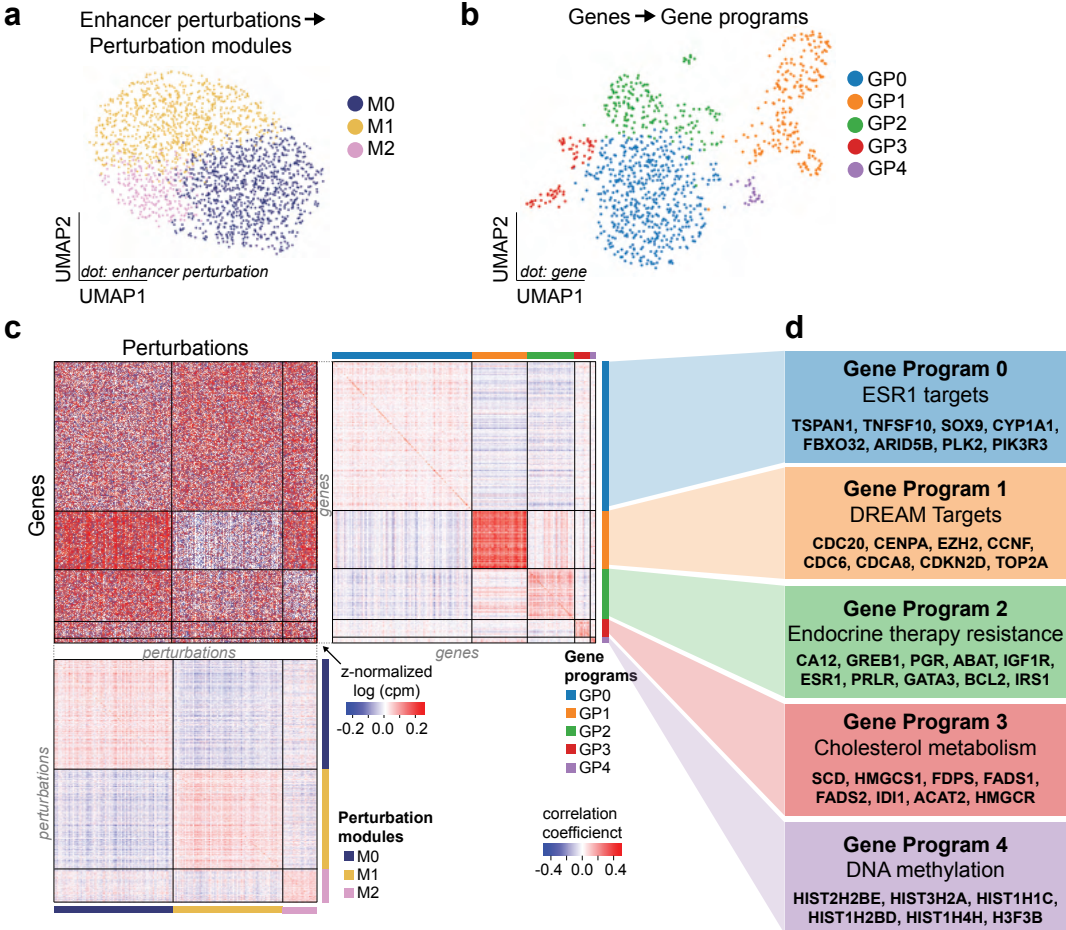

# Supplementary Figure 5 - Overview of pySpade and MDA-MB-361 single cell clustering.

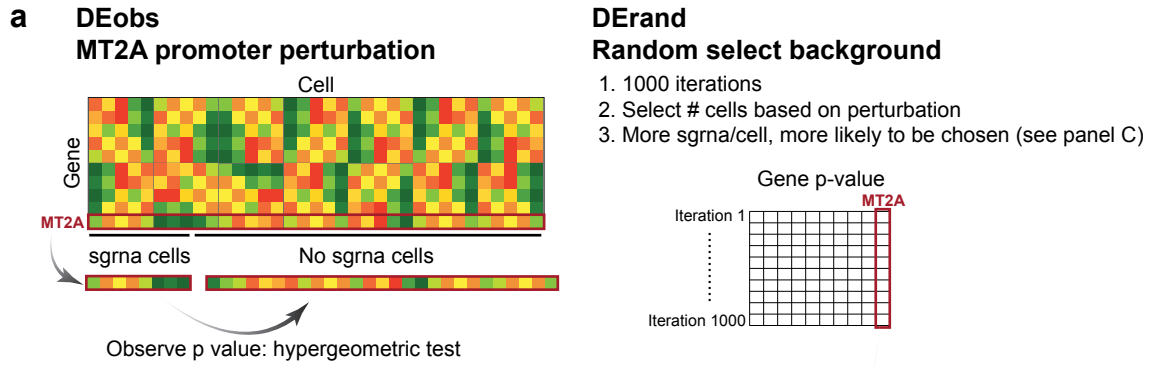

**Local / Global**  
**Calculate adjusted p-value and fold change**  
 MT2A promoter, MT2A

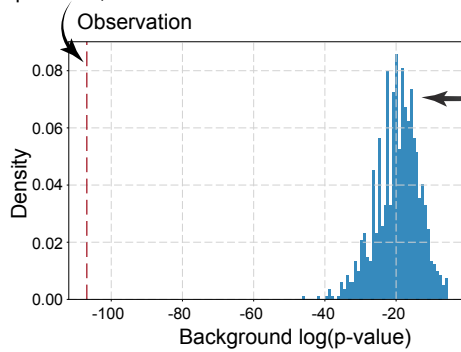

Gaussian adjustment (Significant Score):  
 approximate background distribution as Gaussian distribution  
 Empirical adjustment:  
 $(\text{number of background p-value} < \text{observation}) / 1000$

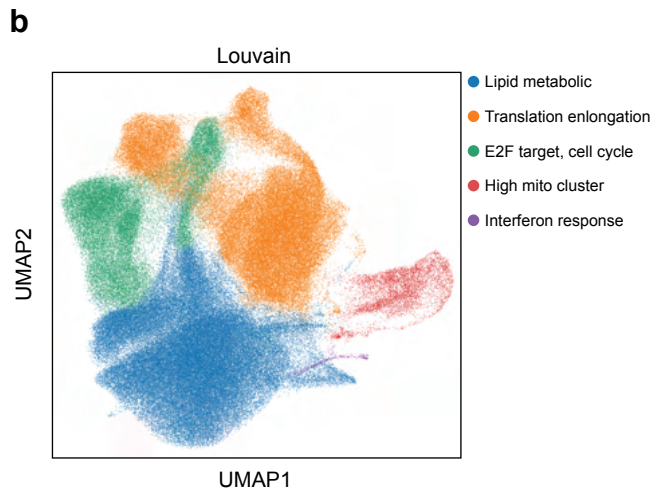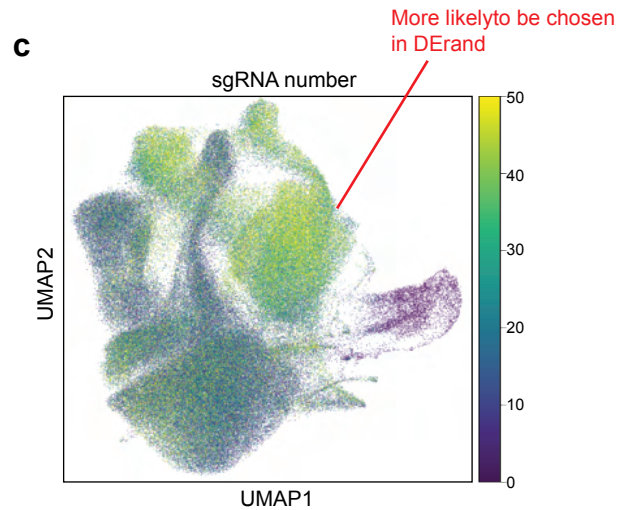

**Supplementary Figure 6 - Perturb-seq identifies non-coding regulatory elements that regulate cancer genes.**

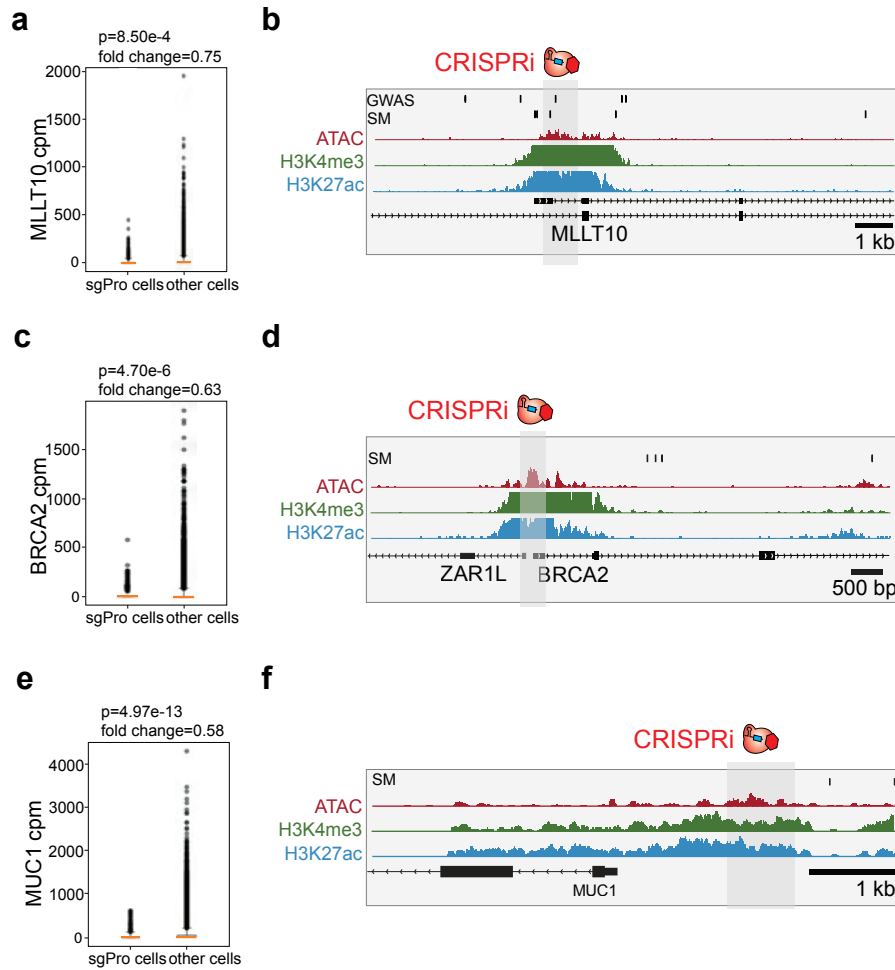

# Supplementary Figure 7 - sgRNAs targeting the same region are functionally consistent with each other.

**a**

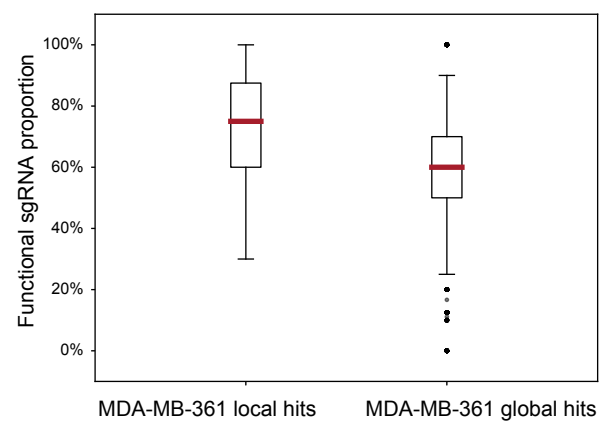

**b**

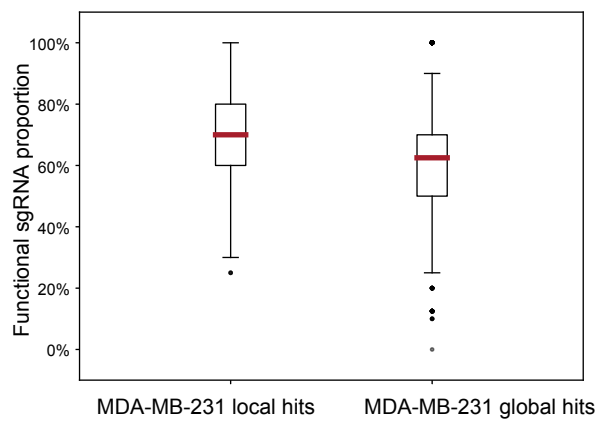

# Supplementary Figure 8 - Single cell data of enhancer indirect hits.

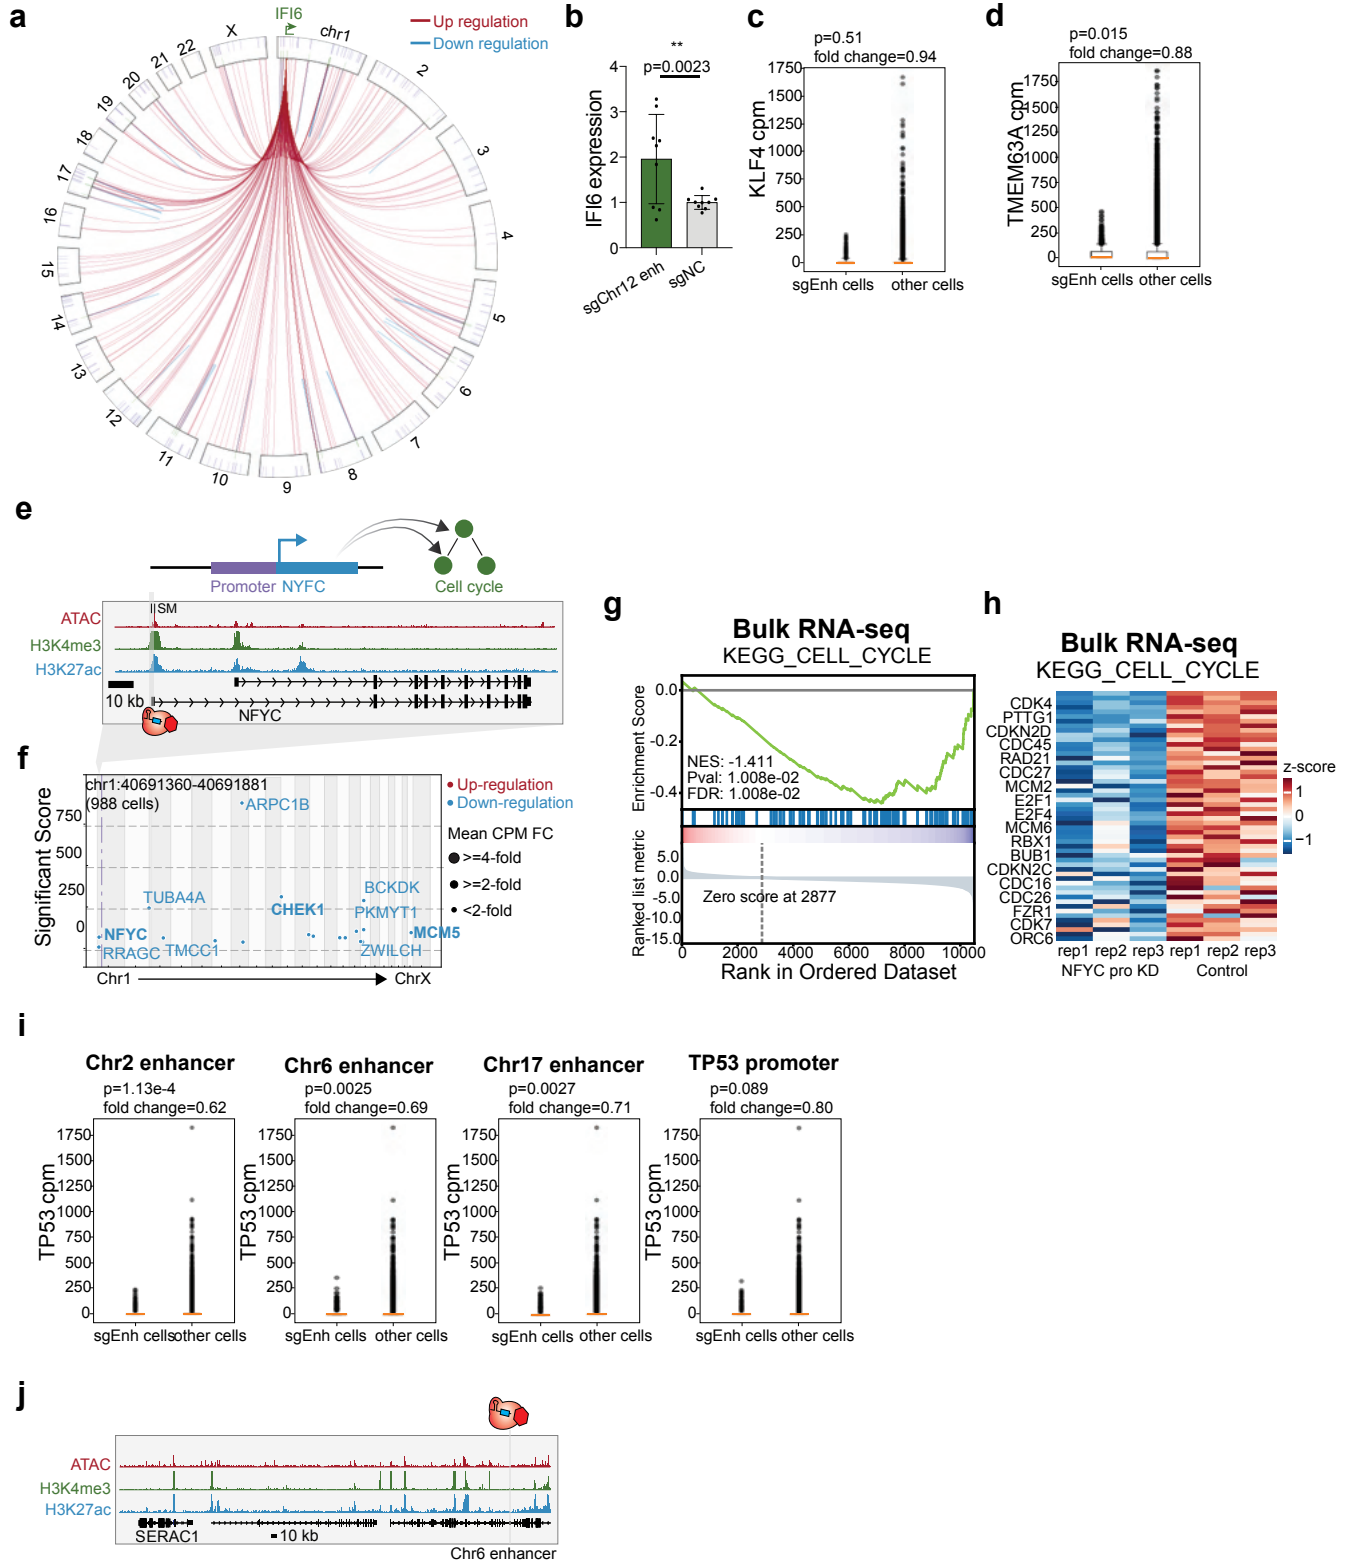



# Supplementary Figure 9 - Perturbation modules and gene programs of MDA-MB-231 screens.

**a**

## MDA-MB-231 Somatic mutations

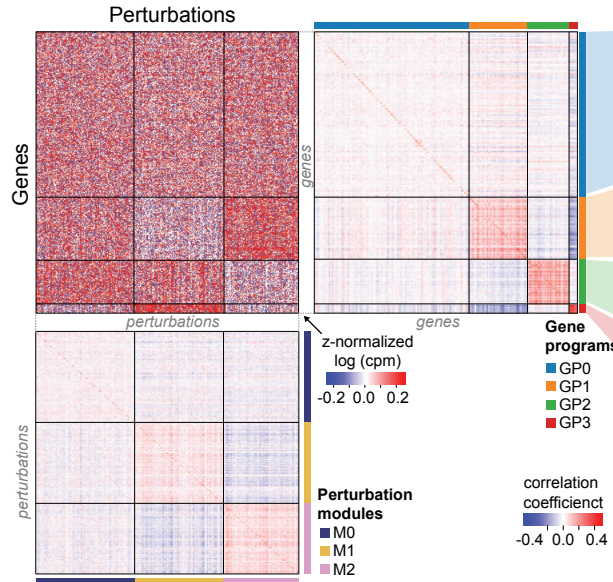

**b**

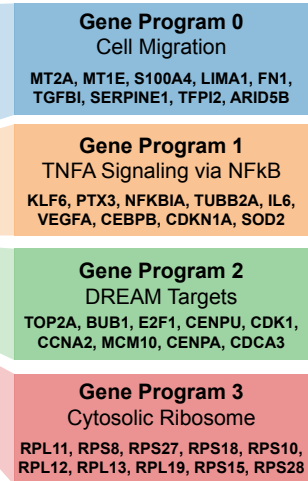

**c**

## MDA-MB-231 GWAS

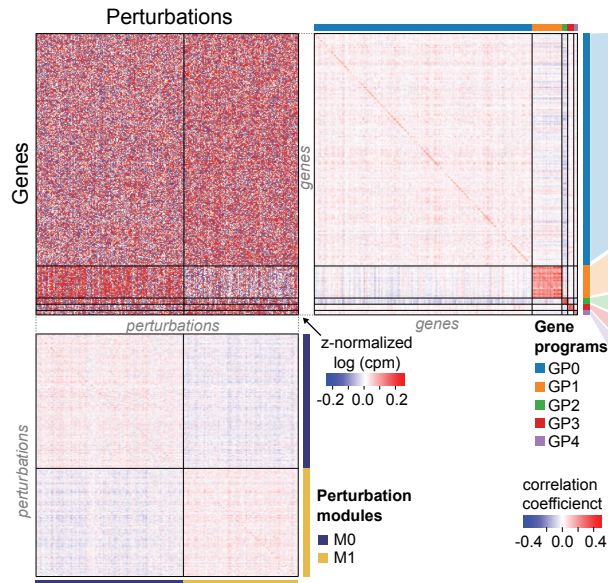

**d**

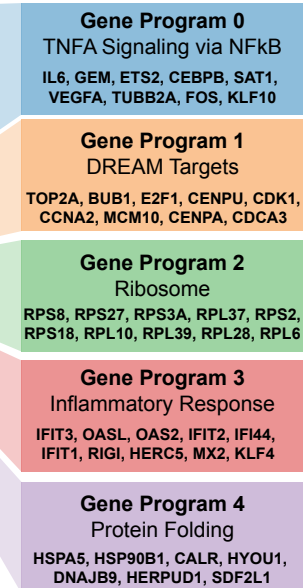

Supplementary Figure 10 - MDA-MB-231 single cell clustering.

a

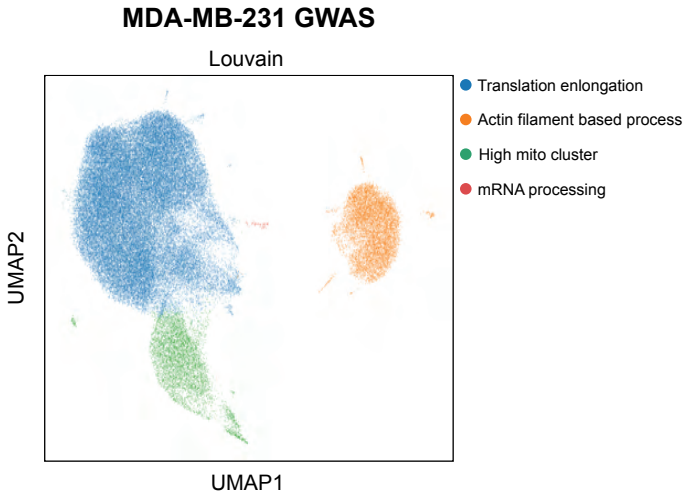

b

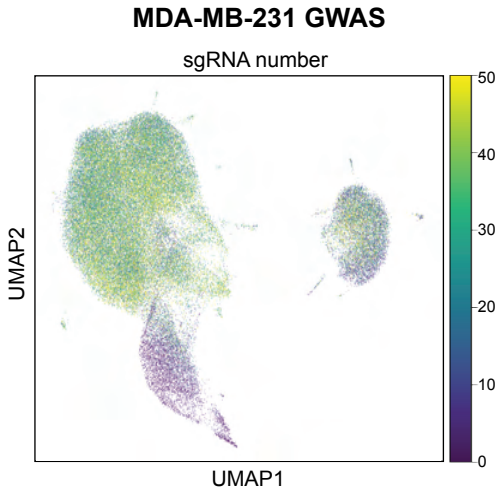

c

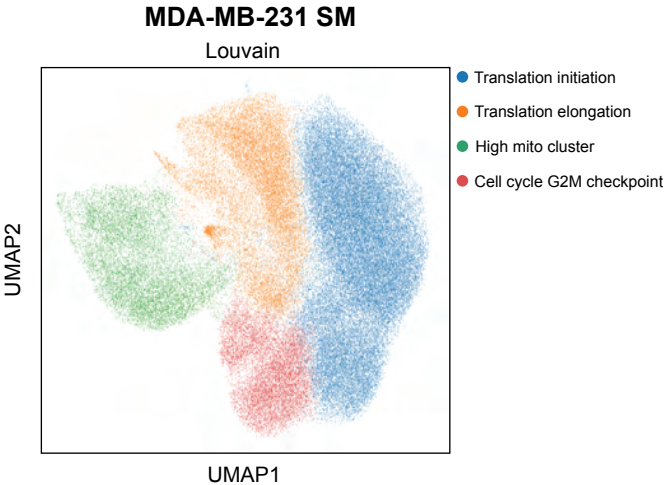

d

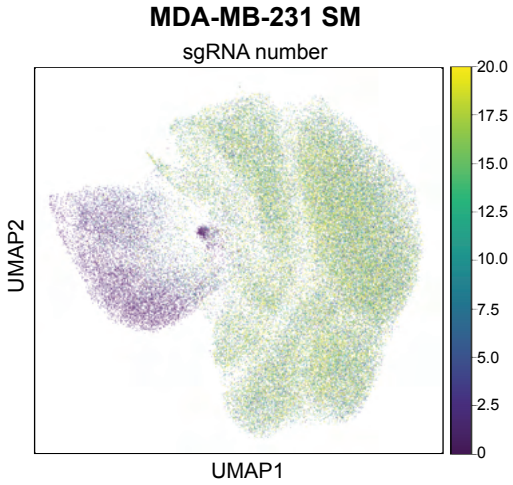

**Supplementary Figure 11 - Local hit comparison in ER+ and ER- cells.**

**a**

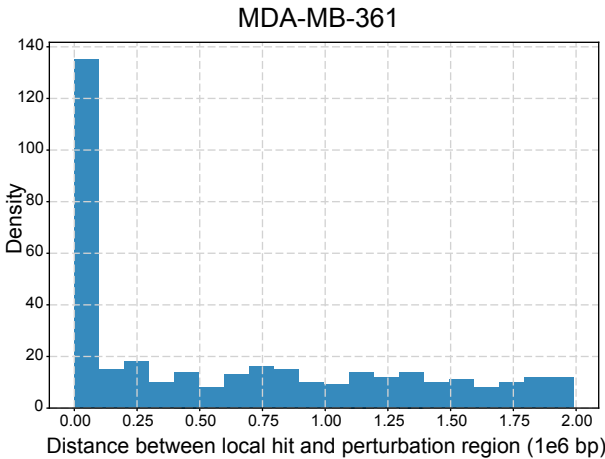

**b**

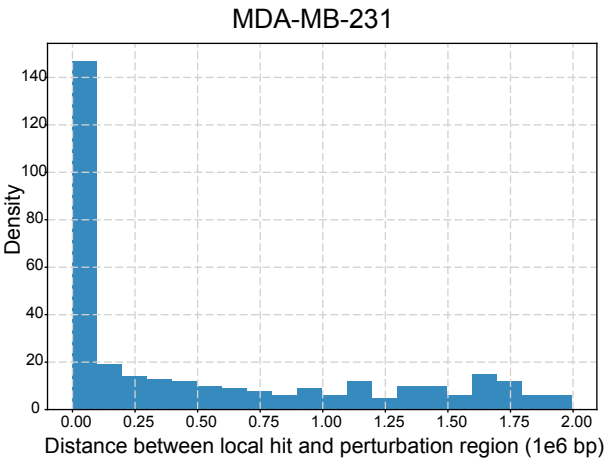

# Supplementary Figure 12 - Comparison between empirical adjustment and bootstrapping adjustment.

**a**

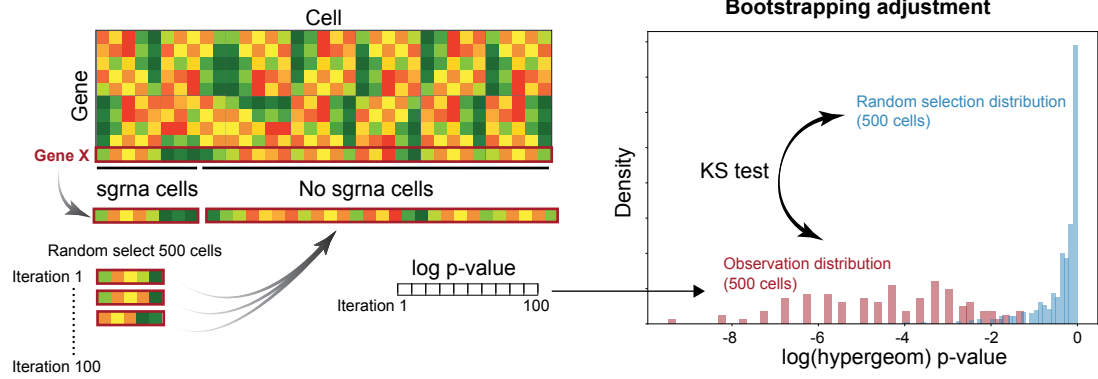

**b**

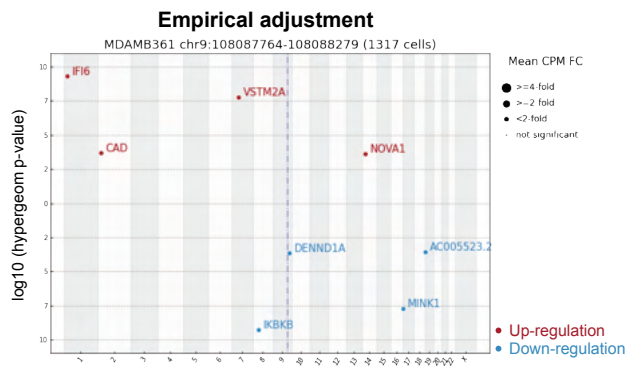

**c**

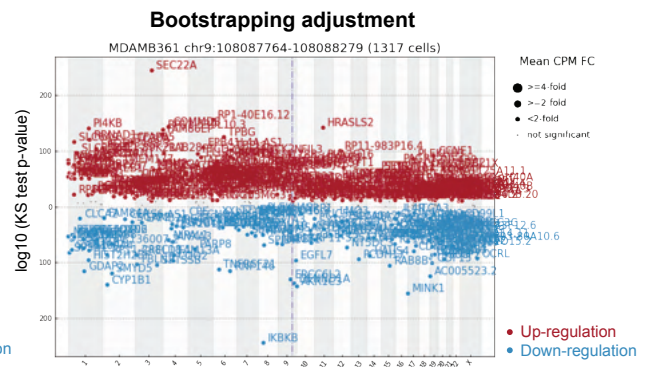

**d**

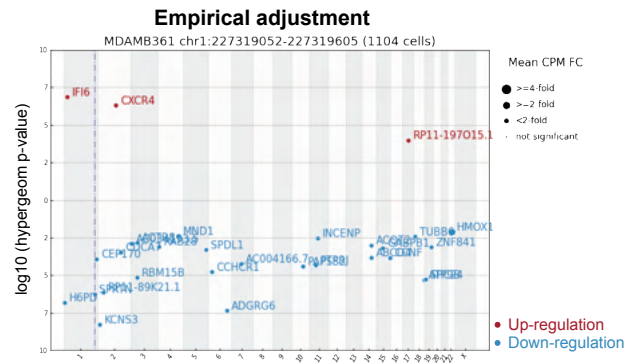

**e**

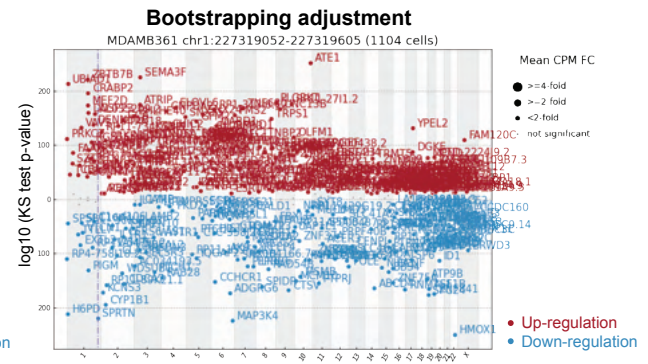

**f**

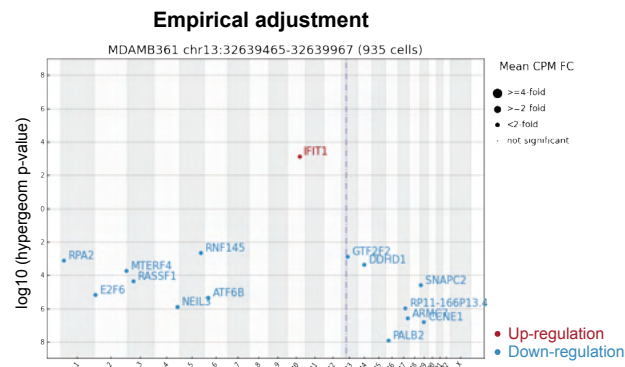

**g**

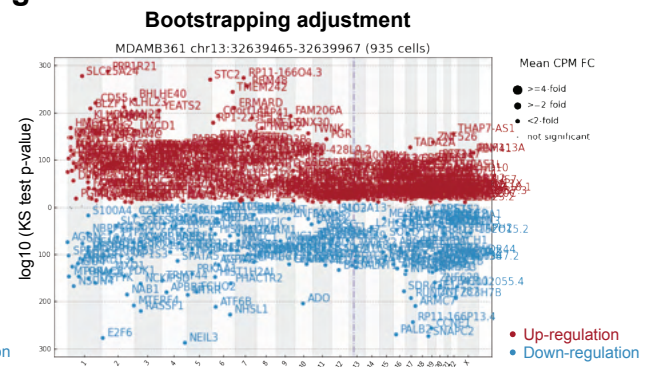

Supplement: NIHPP2023.11.20.567880V1-supplement-1.pdf [file NIHPP2023.11.20.567880V1-supplement-1.pdf]
